# Supplementary material for: Acoustic Monitoring Confirms Significant Poaching Pressure of European Turtle Doves (Streptopelia turtur) during Spring Migration across the Ionian Islands, Greece
Source: MDPI journal article supplement (doi:10.3390/ani13040687), 2023-02-16
Supplement: s1 [file s1]

## Supplementary materials:

**Table S1:** Distance matrix of the locations of the control gunshots (n=15 / 2 shots fired at each location, for a total of 30 gunshots) and the three stations with Cornell Swift sensors.

| Gunshot | Sensor 1 (m) | Sensor 2 (m) | Sensor 3 (m) |
|---------|--------------|--------------|--------------|
| GS01    | 1,116        | 1,224        | 1,329        |
| GS02    | 1,001        | 1,109        | 1,214        |
| GS03    | 897          | 1,005        | 1,110        |
| GS04    | 798          | 906          | 1,011        |
| GS05    | 700          | 808          | 913          |
| GS06    | 600          | 707          | 812          |
| GS07    | 497          | 604          | 708          |
| GS08    | 400          | 507          | 611          |
| GS09    | 350          | 457          | 562          |
| GS10    | 301          | 408          | 512          |
| GS11    | 249          | 356          | 460          |
| GS12    | 202          | 310          | 414          |
| GS13    | 151          | 259          | 363          |
| GS14    | 102          | 205          | 308          |
| GS15    | 74           | 127          | 220          |

**Table S2:** Breeding population size (pairs) and short-term trend of overall populations of destiny countries for turtle doves passing through Greece during spring migration, as reported by Fisher et al. 2018.

| Country                | Breeding Population (pairs) |         |         | Population Trend  |
|------------------------|-----------------------------|---------|---------|-------------------|
|                        | Average                     | Min     | Max     |                   |
| Austria                | 9,250                       | 7,500   | 11,000  | decreasing        |
| Bosnia and Herzegovina | 10,000                      | 5,000   | 15,000  | unknown           |
| Bulgaria               | 67,500                      | 35,000  | 100,000 | unknown           |
| Croatia                | 75,000                      | 50,000  | 100,000 | unknown           |
| Czech Republic         | 75,000                      | 50,000  | 100,000 | moderate decrease |
| Greece                 | 55,000                      | 30,000  | 80,000  | stable            |
| Hungary                | 107,000                     | 64,000  | 150,000 | stable            |
| Kosovo                 | 9,000                       | 7,000   | 11,000  | unknown           |
| N. Macedonia           | 40,000                      | 20,000  | 60,000  | stable            |
| Poland                 | 37,000                      | 25,000  | 49,000  | decreasing        |
| Romania                | 21,000                      | 120,000 | 300,000 | fluctuating       |
| Serbia                 | 46,000                      | 39,000  | 53,000  | decreasing        |
| Slovakia               | 22,500                      | 15,000  | 30,000  | stable            |

Red bars and numbers show the intensity of the gun hunting activity at each site on a given date (gunshots detected using threshold 0.4 of the DTD 1.5.6 gunshot detection algorithm; results are not adjusted by the algorithm's recall rate<sup>0</sup>).

|            |            | Forest Department - Zakynthos |              |                  |                  |          | Forest Department - Corfu |              |         |          |  |
|------------|------------|-------------------------------|--------------|------------------|------------------|----------|---------------------------|--------------|---------|----------|--|
| Month      | Date       | Vasilikos (Zante)             | Keri (Zante) | Kalipado (Zante) | Alikanas (Zante) | Antipaxi | Kastanida (Paxi)          | Ozias (Paxi) | Othonoi | Mathraki |  |
| MARCH      | 19/03/2021 | 560                           | 0            | 0                | 0                | 0        | 0                         | 0            | 0       | 1        |  |
|            | 20/03/2021 | 742                           | 0            | 0                | 0                | 0        | 0                         | 0            | 0       | 0        |  |
|            | 21/03/2021 | 718                           | 0            | 0                | 0                | 5        | 0                         | 0            | 11      | 0        |  |
|            | 22/03/2021 | 866                           | 0            | 0                | 2                | 0        | 0                         | 0            | 0       | 0        |  |
|            | 23/03/2021 | 603                           | 1            | 0                | 0                | 0        | 0                         | 0            | 0       | 0        |  |
|            | 24/03/2021 | 91                            | 7            | 0                | 0                | 0        | 0                         | 0            | 0       | 0        |  |
|            | 25/03/2021 | 729                           | 0            | 0                | 0                | 0        | 0                         | 0            | 0       | 0        |  |
|            | 26/03/2021 | 529                           | 0            | 0                | 0                | 45       | 0                         | 0            | 0       | 0        |  |
|            | 27/03/2021 | 311                           | 0            | 0                | 0                | 0        | 0                         | 0            | 0       | 0        |  |
|            | 28/03/2021 | 217                           | 0            | 0                | 0                | 0        | 0                         | 0            | 0       | 0        |  |
|            | 29/03/2021 | 94                            | 6            | 0                | 0                | 0        | 0                         | 0            | 0       | 0        |  |
|            | 30/03/2021 | 272                           | 1            | 0                | 0                | 107      | 0                         | 0            | 0       | 0        |  |
|            | 31/03/2021 | 62                            | 4            | 0                | 0                | 2        | 0                         | 0            | 0       | 0        |  |
| APRIL      | 01/04/2021 | 122                           | 8            | 0                | 5                | 0        | 0                         | 0            | 0       | 0        |  |
|            | 02/04/2021 | 127                           | 9            | 0                | 5                | 0        | 0                         | 0            | 0       | 0        |  |
|            | 03/04/2021 | 179                           | 1            | 0                | 0                | 0        | 1                         | 0            | 0       | 0        |  |
|            | 04/04/2021 | 80                            | 2            | 0                | 0                | 0        | 1                         | 7            | 1       | 0        |  |
|            | 05/04/2021 | 93                            | 0            | 0                | 0                | 0        | 0                         | 0            | 0       | 0        |  |
|            | 06/04/2021 | 125                           | 1            | 0                | 1                | 0        | 0                         | 0            | 0       | 0        |  |
|            | 07/04/2021 | 141                           | 17           | 0                | 0                | 1        | 0                         | 0            | 19      | 0        |  |
|            | 08/04/2021 | 46                            | 0            | 2                | 0                | 0        | 0                         | 0            | 0       | 0        |  |
|            | 09/04/2021 | 39                            | 5            | 3                | 3                | 0        | 0                         | 0            | 0       | 0        |  |
|            | 10/04/2021 | 383                           | 50           | 1                | 5                | 1        | 0                         | 0            | 0       | 1        |  |
|            | 11/04/2021 | 19                            | 82           | 3                | 2                | 0        | 1                         | 0            | 1       | 0        |  |
|            | 12/04/2021 | 95                            | 172          | 4                | 3                | 14       | 0                         | 0            | 0       | 8        |  |
|            | 13/04/2021 | 18                            | 578          | 7                | 21               | 331      | 20                        | 6            | 1       | 35       |  |
|            | 14/04/2021 | 2                             | 448          | 9                | 9                | 56       | 0                         | 2            | 0       | 0        |  |
|            | 15/04/2021 | 6                             | 9            | 2                | 13               | 19       | 0                         | 1            | 0       | 0        |  |
|            | 16/04/2021 | 20                            | 414          | 23               | 28               | 26       | 3                         | 4            | 3       | 0        |  |
|            | 17/04/2021 | 5                             | 445          | 8                | 18               | 124      | 90                        | 51           | 55      | 7        |  |
|            | 18/04/2021 | 5                             | 121          | 51               | 40               | 10       | 0                         | 0            | 6       | 4        |  |
|            | 19/04/2021 | 5                             | 8            | 17               | 4                | 18       | 3                         | 0            | 5       | 9        |  |
|            | 20/04/2021 | 13                            | 28           | 18               | 7                | 24       | 2                         | 2            | 1       | 13       |  |
| 21/04/2021 | 13         | 264                           | 20           | 20               | 270              | 29       | 0                         | 25           | 51      |          |  |
| 22/04/2021 | 1          | 978                           | 43           | 104              | 271              | 129      | 59                        | 10           | 174     |          |  |
| 23/04/2021 | 3          | 784                           | 50           | 33               | 258              | 242      | 97                        | 32           | 127     |          |  |
| 24/04/2021 | 1          | 931                           | 11           | 13               | 277              | 286      | 7                         | 44           | 33      |          |  |
| 25/04/2021 | 6          | 158                           | 21           | 38               | 41               | 4        | 3                         | 0            | 13      |          |  |
| 26/04/2021 | 2          | 59                            | 29           | 21               | 1                | 1        | 0                         | 13           | 16      |          |  |
| 27/04/2021 | 3          | 221                           | 12           | 33               | 86               | 33       | 13                        | 1            | 109     |          |  |
| 28/04/2021 | 1          | 41                            | 6            | 3                | 32               | 16       | 13                        | 7            | 32      |          |  |
| 29/04/2021 | 3          | 112                           | 23           | 42               | 4                | 7        | 0                         | 4            | 13      |          |  |
| 30/04/2021 | 2          | 310                           | 34           | 45               | 47               | 20       | 1                         | 0            | 1       |          |  |
| MAY        | 01/05/2021 | 1                             | 96           | 35               | 51               | 76       | 76                        | 48           | 0       | 35       |  |
|            | 02/05/2021 | 1                             | 136          | 589              | 250              | 115      | 122                       | 54           | 0       | 11       |  |
|            | 03/05/2021 | 1                             | 106          | 128              | 44               | 66       | 5                         | 8            | 0       | 0        |  |
|            | 04/05/2021 | 2                             | 5            | 10               | 10               | 4        | 1                         | 4            | 0       | 0        |  |
|            | 05/05/2021 | 1                             | 1            | 8                | 1                | 0        | 0                         | 0            | 0       | 1        |  |
|            | 06/05/2021 | 1                             | 1            | 5                | 15               | 1        | 0                         | 0            | 1       | 0        |  |
|            | 07/05/2021 | 2                             | 5            | 4                | 24               | 14       | 0                         | 0            | 0       | 0        |  |
|            | 08/05/2021 | 0                             | 4            | 4                | 3                | 5        | 0                         | 0            | 0       | 0        |  |
|            | 09/05/2021 | 0                             | 3            | 1                | 3                | 0        | 0                         | 0            | 0       | 0        |  |
|            | 10/05/2021 | 0                             | 8            | 2                | 0                | 0        | 0                         | 0            | 0       | 1        |  |
|            | 12/05/2021 | 0                             | 0            | 0                | 0                | 0        | 0                         | 0            | 0       | 10       |  |
|            | 13/05/2021 | 0                             | 0            | 2                | 0                | 0        | 0                         | 0            | 0       | 3        |  |
|            | 14/05/2021 | 0                             | 0            | 1                | 0                | 0        | 0                         | 0            | 0       | 1        |  |
|            | 15/05/2021 | 0                             | 4            | 8                | 0                | 0        | 0                         | 0            | 0       | 0        |  |
|            | 16/05/2021 | 0                             | 3            | 1                | 0                | 0        | 0                         | 0            | 0       | 0        |  |
|            | 17/05/2021 | 0                             | 4            | 0                | 0                | 0        | 0                         | 0            | 0       | 0        |  |
|            | 20/05/2021 | 0                             | 0            | 1                | 0                | 0        | 0                         | 4            | 0       | 0        |  |
|            | 24/05/2021 | 0                             | 0            | 0                | 0                | 0        | 0                         | 0            | 0       | 2        |  |

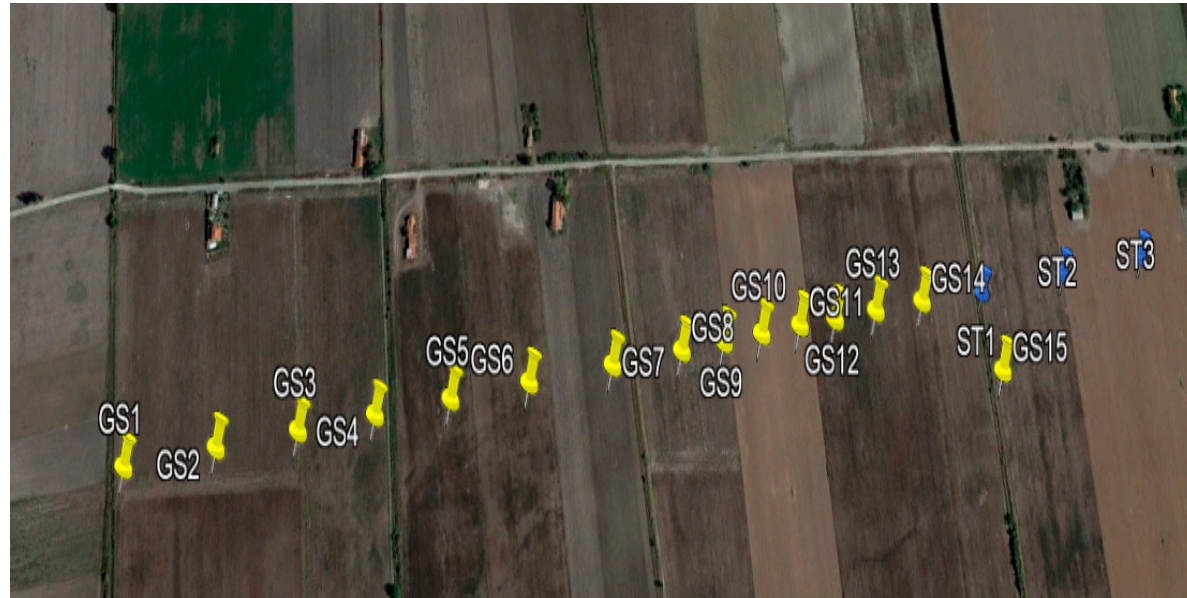

**Figure S1:** Field design of control gunshots

GS1 to GS15 (yellow pins) mark the 15 locations at which gunshots were fired, and ST1 to ST3 (blue pins) mark the acoustic stations where the SWIFT sensors were placed. See Table S1 for distance matrix of all gunshot locations and the three stations. [Scale: Blue pins are located exactly 100m apart]

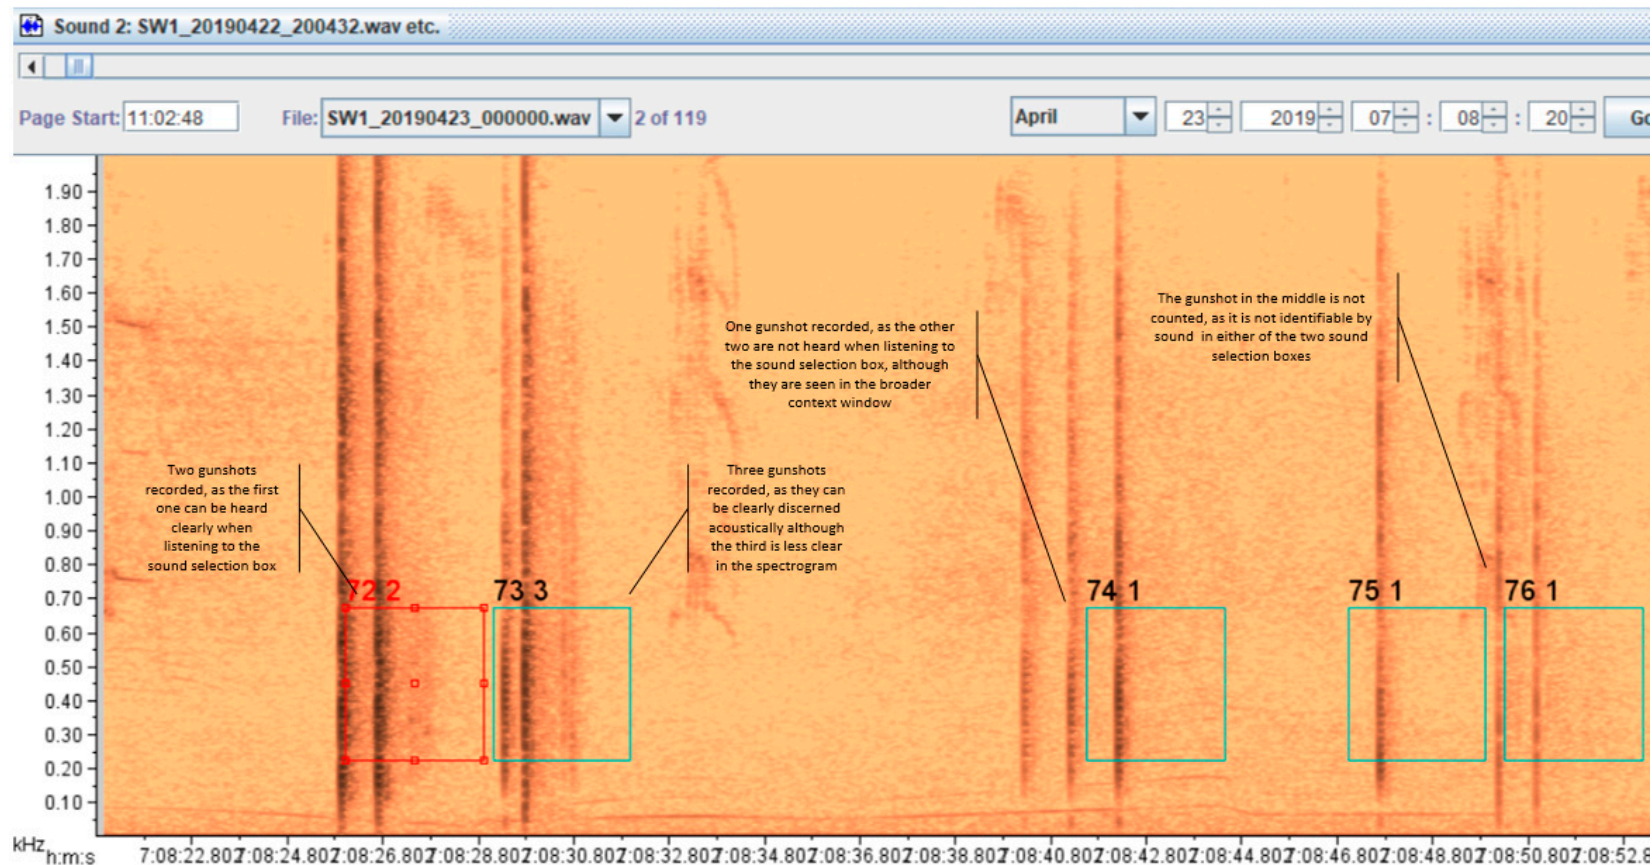

**Figure S2:** Description of protocol used to count gunshots (using Raven Pro 1.6) from the putative gunshot results (selection tables) produced by the DTD 1.5.6 gunshot detection algorithm. The figure shows as an example a 30 second spectrogram viewed in Raven Pro's context window.

Although at first glance one can count ten gunshots, only eight of those are contained within the four sound selection boxes (Nr 72 to 76) flagged by the detection algorithm for review. Acoustic review of the four sound selection windows detected one extra gunshot in box 73 (three in total, rather than two most easily seen), and confirmed that both gunshots can be heard in box 72 as although only the tail of the first one is heard, and can be identified as such with confidence. On the contrary, two gunshots right before boxes 74 and 76 are not counted as they can not be heard by listening to the sound selection box.
